# Supplementary material
Source: PubMed Central journal article supplement (PMC3121842)
Supplement: 1019268108_pnas.1019268108_SI.pdf [file 1019268108_pnas.1019268108_SI.pdf]

# Supporting Information

Gonzalez et al. 10.1073/pnas.1019268108

## SI Materials and Methods

**Antibodies, Drugs, cDNA Constructs, and siRNA.** Antibodies against phospho-Akt (Ser<sup>473</sup> and Thr<sup>308</sup>), Akt1, Akt2, phospho-Akt Substrate (PAS), phospho-FoxO1 (Ser<sup>256</sup>), Akt, ATGL and FoxO1 were from Cell Signaling Technologies. Protein A/G PLUS agarose beads were purchased from Santa Cruz Biotechnology. Mouse and rabbit antiFlag epitope antibodies were from Sigma-Aldrich. Anti-TBC1D4 and anti-phosphoTBC1D4 (Thr<sup>642</sup>) antibodies were from Upstate Biotech. Mouse antiHA epitope monoclonal antibody was from Covance. Antirene fluorescent protein antibody was from Invitrogen. Fluorescent secondary antibodies were purchased from Jackson Immunolabs, Inc., and Invitrogen. PI3-kinase isoform specific inhibitors PI90 (p110 $\alpha$ ), p103 (p110 $\alpha$ ), TGX221 (p110 $\beta$ ), SW14 (p110  $\delta$  &  $\gamma$ ), SW30 (p110 $\gamma$ ) were kindly provided by Kevan Shokat (University of California San Francisco) (1). Akt inhibitor (Akti1/2) was purchased from Calbiochem. The cDNA constructs encoding Flag-Akt1 and Flag-Akt2 were previously described (2). FoxO1-GFP construct was kindly provided by Domenico Accili (Columbia University) (3). The following targeting sequences were used to knockdown murine Akt1: CCCAGAACAAATTAGATTAGATTCATGTAGA; Akt2: CACAGGACACAGCATGGCCGTCAT; PTEN: TTTGCAGTATAGAGCGUGCAGAUAA; FoxO1: AGTTACGGAGGATTGAACCAAGTATA; control: ATGTCACGGCGTACGTTCTGTGTG. Stealth siRNAs were purchased from Invitrogen.

**Cell Culture, Adipocyte Differentiation, and Electroporation.** 3T3-L1 fibroblast were cultured, differentiated into adipocytes and electroporated as previously described (4, 5). All experiments were performed on day 5 or 6 after differentiation. Stably expressing Flag-tagged Akt1 and Akt2 3T3-L1 cells have been previously described (2). For transient knockdown of target genes, 3T3-L1 adipocytes were electroporated with specific siRNAs (4  $\mu$ M), and experiments were performed 48 hr after electroporation or as noted.

**Immunoblot Analyses and Immunoprecipitation.** 3T3-L1 adipocytes were starved in serum-free-DMEM with 20 mM of sodium bicarbonate, 20 mM HEPES (pH7.2) (SF-DMEM) at 37 C in 5%CO<sub>2</sub>/air for 3–8 h prior to all experiments. After insulin treatments, 3T3-L1 adipocytes were washed with 150 mM NaCl, 20 mM HEPES, 1 mM CaCl<sub>2</sub>, 5 mM KCl, 1 mM MgCl<sub>2</sub> (pH 7.2) (Media 1) and lysed in RIPA or Laemmli buffer. For immunoblot ana-

lyses cellular proteins were resolved in SDS/PAGE, transferred to nitrocellulose membranes, and probed with antibodies using protocols provided by the suppliers. Antibody binding was detected using enhanced chemiluminescence (Supersignal West Pico, Thermo Scientific). Densitometric analyses of the immunoblots were performed using a ChemiImager 4000 (Alpha-Innotech). Immunoprecipitation of Flag-tagged Akt1 or Akt2 was performed as described under in vitro Akt activity assay and in (2).

**Glycerol Release.** Control 3T3-L1 adipocytes or adipocytes exposed to chronic hyperinsulinemia (10 nM insulin for 16 h) were washed three times with serum-free media and incubated in serum-free media with 2% fatty acid free bovine serum albumin for 3 h. Glycerol content in the media was measured colorimetrically using a free glycerol assay kit from Biovision. Cells were then washed with PBS and lysed in 1% Triton X-100. The protein concentration was determined and used to normalize the glycerol release per sample. Experiments were carried out in duplicate.

**In Vitro Akt Activity Assay.** 3T3-L1 adipocytes expressing Flag-tagged Akt constructs were starved in serum-free-DMEM for 2–4 h. After insulin stimulation for 15 min, adipocytes were washed with Media 1 and lysed in 20 mM Tris-HCl (pH 7.5), 150 mM NaCl, 1 mM EDTA, 1 mM EDTA, 1% Triton, 2.5 mM sodium pyrophosphate, 1 mM  $\beta$ -glycerophosphate, 1 mM Na<sub>3</sub>VO<sub>4</sub>, protease inhibitors cocktail (Pierce). Cell lysates were centrifuged and supernatants incubated with mouse antiFlag M2 antibody (4  $\mu$ g/mL) and Protein A/G-Sepharose beads overnight at 4 C. Flag-tagged Akt immunocomplexes were washed twice with lysis buffer and twice with kinase reaction buffer [25 mM Tris (pH 7.5), 5 mM  $\beta$ -glycerophosphate, 2 mM DTT, 0.1 mM Na<sub>3</sub>VO<sub>4</sub>, 1  $\mu$ g/mL leupeptin]. Immunocomplexes were next incubated in kinase buffer supplemented with ATP (0.2 mM) and GSK3 $\beta$  fusion protein (10  $\mu$ g/mL, Cell Signaling Technologies) for 30 min at 30 C. The reaction was terminated by adding 2 $\times$  Laemmli buffer. Samples were analyzed by Western blotting to assess GSK3 $\beta$  fusion protein phosphorylation using an anti-phosphoSer9-GSK3 $\beta$  antibody. In the same samples total Flag-Akt1 or Flag-Akt2 was determined by western blotting using antiFlag antibody.

1. Knight ZA, et al. (2006) A pharmacological map of the PI3-K family defines a role for p110 $\alpha$  in insulin signaling. *Cell* 125:733–747.
2. Gonzalez E, McGraw TE (2009) Insulin-modulated Akt subcellular localization determines Akt isoform-specific signaling. *Proc Natl Acad Sci USA* 106:7004–7009.
3. Frescas D, Valenti L, Accili D (2005) Nuclear trapping of the forkhead transcription factor FoxO1 via Sirt-dependent deacetylation promotes expression of glucogenic genes. *J Biol Chem* 280:20589–20595.

4. Karylowski O, et al. (2004) GLUT4 is retained by an intracellular cycle of vesicle formation and fusion with endosomes. *Mol Biol Cell* 15:870–882.
5. Zeigerer A, et al. (2002) GLUT4 retention in adipocytes requires two intracellular insulin-regulated transport steps. *Mol Biol Cell* 13:2421–2435.

**Fig. S2.** Dose response for insulin-induced endogenous FoxO1 nuclear exclusion in 3T3-L1 adipocytes. Endogenous FoxO1 was detected by indirect immunofluorescence using an anti-FoxO1 antibody. Cells were scored for the presence of nuclear or cytosolic FoxO1 and results are expressed as the percentage of cells with cytosolic FoxO1. Each data point represents the mean  $\pm$  SD from 2–3 experiments.

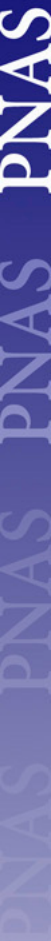

Gonzalez et al. [www.pnas.org/cgi/doi/10.1073/pnas.1019268108](http://www.pnas.org/cgi/doi/10.1073/pnas.1019268108)
